# Supplementary material
Source: Research Square preprint supplement (doi:10.21203/rs.3.rs-9946219/v1)
Supplement: Supplementary file 1 [file 3273534e710a87b1ab4d7bc3.docx]

**Additional files**

**Table S1. Full baseline characteristics according to sleep status.**

| **Characteristic** | **Total (n=726)** | **Normal sleep (n=408)** | **Poor sleep (n=318)** | **P value** |
| --- | --- | --- | --- | --- |
| Age, years | 72.26 ± 5.14 | 72.39 ± 5.17 | 72.08 ± 5.10 | 0.419 |
| Men, n (%) | 361 (49.7) | 219 (53.7) | 142 (44.7) | 0.019 |
| Chronic conditions = 0 | 295 (40.6) | 175 (42.9) | 120 (37.7) | 0.262 |
| Chronic conditions = 1 | 241 (33.2) | 135 (33.1) | 106 (33.3) |  |
| Chronic conditions = 2 | 127 (17.5) | 69 (16.9) | 58 (18.2) |  |
| Chronic conditions = 3 | 63 (8.7) | 29 (7.1) | 34 (10.7) |  |
| PSQI score | 6.67 ± 4.52 | 3.35 ± 1.66 | 10.93 ± 3.29 | <0.001 |
| BMI, kg/m² | 23.11 ± 3.31 | 22.95 ± 3.22 | 23.31 ± 3.42 | 0.160 |
| Weight, kg | 54.11 ± 9.09 | 54.25 ± 8.90 | 53.93 ± 9.35 | 0.645 |
| Body fat percentage, % | 32.33 ± 8.28 | 31.63 ± 8.07 | 33.22 ± 8.46 | 0.012 |
| Skeletal muscle mass index | 6.02 ± 0.94 | 6.07 ± 0.91 | 5.96 ± 0.96 | 0.127 |
| Visceral fat area | 91.57 ± 36.98 | 88.95 ± 35.49 | 94.97 ± 38.62 | 0.034 |
| Total energy intake, kcal/day | 1667.29 ± 525.56 | 1701.87 ± 526.52 | 1622.91 ± 521.79 | 0.044 |
| Dietary fat energy ratio | 0.36 ± 0.09 | 0.35 ± 0.09 | 0.37 ± 0.09 | 0.007 |
| Fat intake, g/day | 65.68 ± 24.62 | 65.82 ± 25.53 | 65.49 ± 23.42 | 0.856 |
| Carbohydrate energy ratio | 0.52 ± 0.11 | 0.52 ± 0.11 | 0.51 ± 0.10 | 0.052 |
| Carbohydrate intake, g/day | 215.40 ± 82.76 | 222.26 ± 82.70 | 206.61 ± 82.13 | 0.011 |
| Protein energy ratio | 0.13 ± 0.03 | 0.13 ± 0.03 | 0.13 ± 0.03 | 0.154 |
| Protein intake, g/day | 55.16 ± 24.01 | 57.10 ± 24.46 | 52.69 ± 23.22 | 0.013 |
| ECW/TBW | 0.39 ± 0.01 | 0.39 ± 0.01 | 0.39 ± 0.01 | 0.981 |
| Basal metabolic rate, kcal | 1157.46 ± 147.22 | 1167.58 ± 143.62 | 1144.44 ± 150.98 | 0.039 |
| Waist-to-hip ratio | 0.87 ± 0.05 | 0.87 ± 0.05 | 0.87 ± 0.05 | 0.657 |
| Obesity degree, % | 107.58 ± 16.16 | 106.64 ± 15.61 | 108.80 ± 16.78 | 0.081 |
| Body cell mass, kg | 23.48 ± 4.50 | 23.78 ± 4.39 | 23.09 ± 4.62 | 0.046 |
| Bone mineral content, kg | 2.04 ± 0.34 | 2.07 ± 0.34 | 2.01 ± 0.35 | 0.027 |
| Protein mass, kg | 7.09 ± 1.36 | 7.18 ± 1.33 | 6.97 ± 1.39 | 0.040 |
| Phase angle, 50 kHz | 4.62 ± 0.63 | 4.63 ± 0.64 | 4.60 ± 0.63 | 0.635 |

*Values are mean ± SD or n (%). Poor sleep quality was defined as PSQI score >5.*

**Table S2. Pearson correlation matrix for key variables.**

| **Variable** | **Dietary fat energy ratio** | **Fat intake, g/day** | **PBF** | **SMI** | **PSQI score** |
| --- | --- | --- | --- | --- | --- |
| Dietary fat energy ratio | 1 | 0.544*** | 0.086* | -0.133*** | 0.136*** |
| Fat intake, g/day | 0.544*** | 1 | -0.084* | 0.140*** | -0.005 |
| PBF | 0.086* | -0.084* | 1 | -0.289*** | 0.156*** |
| SMI | -0.133*** | 0.140*** | -0.289*** | 1 | -0.100** |
| PSQI score | 0.136*** | -0.005 | 0.156*** | -0.100** | 1 |

*Values are Pearson correlation coefficients. * p < 0.05, ** p < 0.01, *** p < 0.001.*

**Table S3. Multicollinearity diagnostics.**

| **Predictor** | **Tolerance** | **VIF** |
| --- | --- | --- |
| Dietary fat energy ratio | 0.8609 | 1.1616 |
| Body fat percentage | 0.0963 | 10.3858 |
| SMI | 0.1038 | 9.6363 |
| Age | 0.8903 | 1.1232 |
| Sex | 0.4002 | 2.4984 |
| BMI | 0.0752 | 13.2914 |
| Total energy intake | 0.7037 | 1.4210 |
| Red meat intake | 0.7211 | 1.3867 |

*VIFs were calculated using PSQI score as the dependent variable. Highly correlated body-composition indicators were not entered simultaneously in the main mediation model. VIF, variance inflation factor.*

**Table S4. Exploratory mediation analyses.**

| **Exploratory pathway** | **a path (P value)** | **b path (P value)** | **Direct effect c' (P value)** | **Indirect effect** | **95% BC bootstrap CI** | **Inference** |
| --- | --- | --- | --- | --- | --- | --- |
| Fat intake, g/day → PBF→PSQI | -0.028 (p=0.026) | 0.059 (p=0.016) | 0.023 (p=0.019) | -0.0017 | -0.0046 to -0.0002 | Significant, very small negative |
| Fat intake, g/day → SMI → PSQI | 0.0053 (p<0.001) | -0.101 (p=0.660) | 0.024 (p=0.015) | -0.0005 | -0.0034 to 0.0019 | Not significant |
| Dietary fat energy ratio → SMI → PSQI | -0.983 (p=0.002) | -0.173 (p=0.456) | 6.074 (p=0.002) | 0.170 | -0.271 to 0.714 | Not significant |

*All exploratory models used PROCESS Model 4 and the same covariate strategy as the primary mediation model. PBF, body fat percentage; SMI, skeletal muscle mass index; PSQI, Pittsburgh Sleep Quality Index.*

**Table S5. Sex-stratified descriptive statistics for key variables.**

| **Variable** | **Men, n** | **Men, mean ± SD** | **Women, n** | **Women, mean ± SD** | **P value** |
| --- | --- | --- | --- | --- | --- |
| Dietary fat energy ratio | 361 | 0.35 ± 0.09 | 365 | 0.37 ± 0.09 | 0.048 |
| Body fat percentage, % | 352 | 27.68 ± 6.54 | 355 | 36.93 ± 7.18 | <0.001 |
| PSQI score | 361 | 6.08 ± 4.12 | 365 | 7.26 ± 4.82 | <0.001 |

*P values were obtained using independent-sample t tests. Sex was coded as male = 1 and female = 2.*

**Table S6. Sensitivity analyses.**

| **Sensitivity analysis** | **Key result** | **Inference** |
| --- | --- | --- |
| Alternative Model 7: sex moderating the dietary fat energy ratio → PBF pathway | Interaction β = 3.785, SE = 5.903, p = 0.522; index of moderated mediation = 0.284, 95% BC CI: −0.506 to 1.304 | No evidence of first-stage sex moderation |
| Main mediation model using binary sleep-quality outcome | Indirect effect = 0.129, 95% BC CI: −0.022 to 0.447 | The indirect effect was attenuated when PSQI was dichotomized |
| Main mediation model after excluding one participant with absolute studentized residual >3 | Indirect effect = 0.471, 95% BC CI: 0.061 to 1.255 | The primary indirect pathway remained significant |
| **Sensitivity analysis** | **Key result** | **Inference** |
| Alternative Model 7: sex moderating dietary fat energy ratio -> PBF | Interaction β=3.785, SE=5.903, p=0.522; index=0.284, 95% BC CI: -0.506 to 1.304 | Not significant; supports the second-stage moderation specification |
| Primary mediation model after excluding one participant with absolute studentized residual >3 | Indirect effect=0.471, 95% BC CI: 0.061 to 1.255 | Primary indirect pathway remained significant |

*BC, bias-corrected; CI, confidence interval; PBF, body fat percentage.*


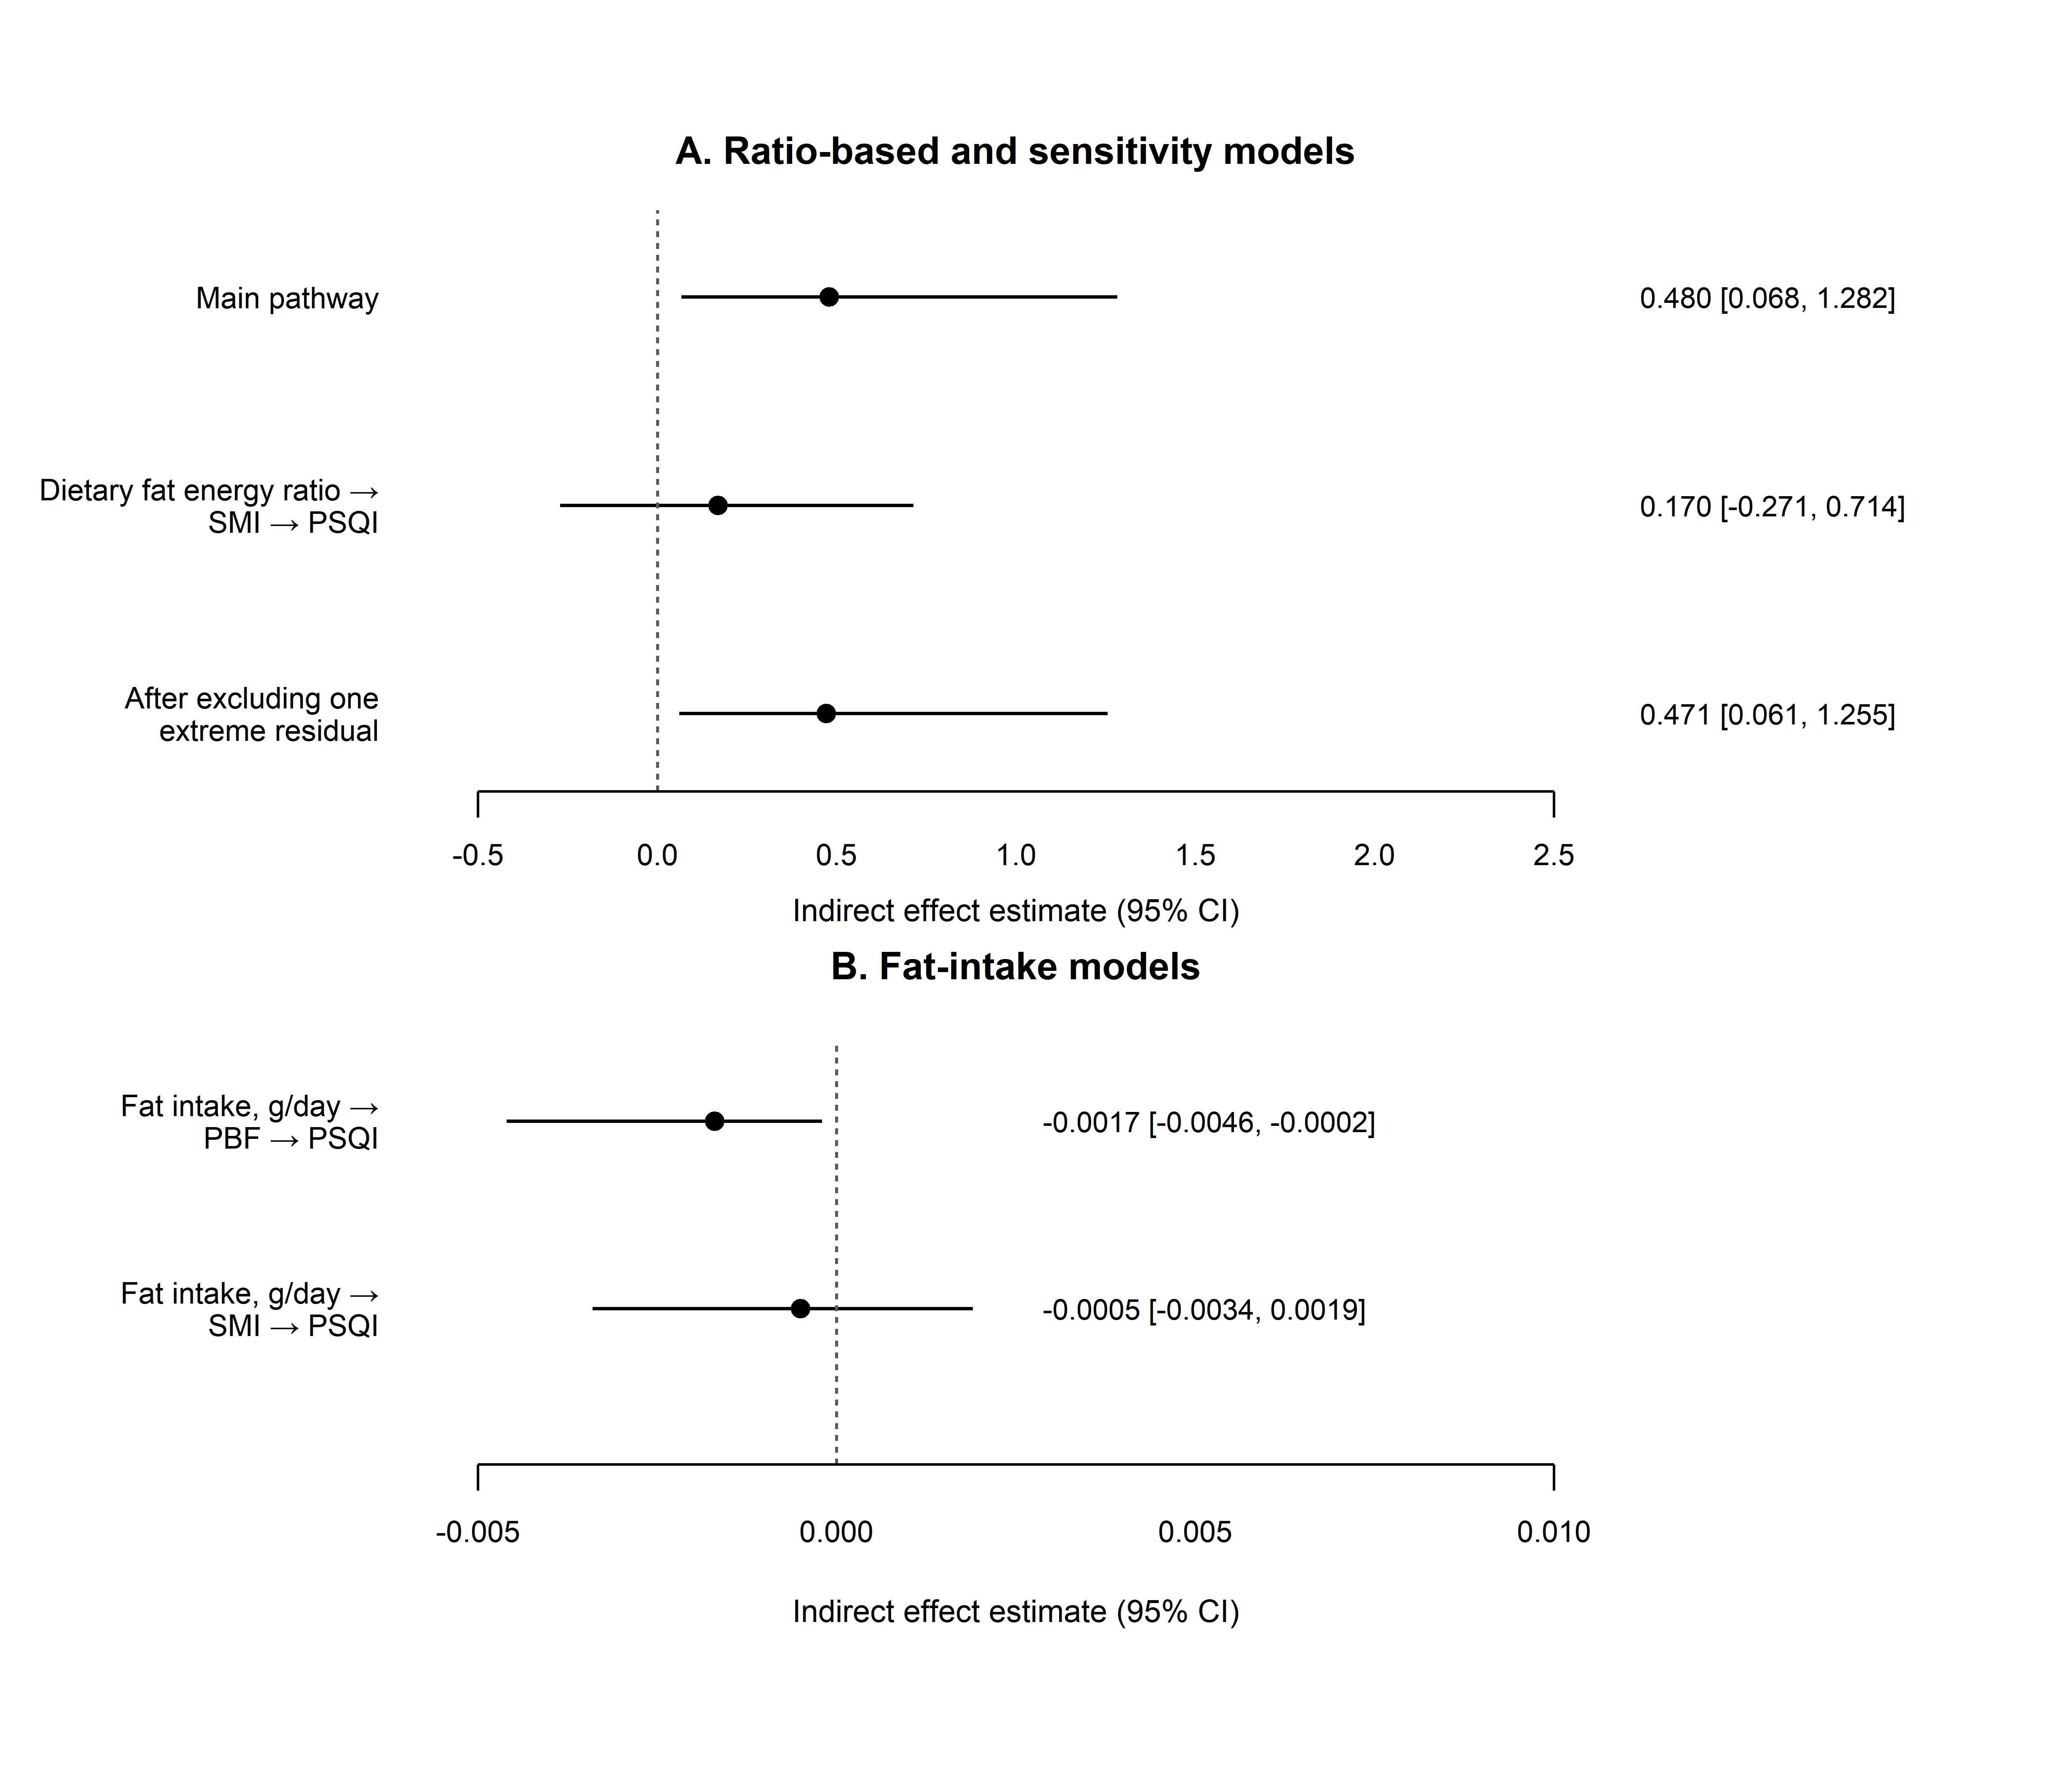


Figure S1. Exploratory and sensitivity indirect-effect estimates for the main and alternative mediation pathways shown in the supplementary analyses. Error bars represent 95% bias-corrected bootstrap confidence intervals. PBF, percentage body fat; SMI, skeletal muscle index; PSQI, Pittsburgh Sleep Quality Index.
